# Supplementary material for: Non-pharmacological pain relief interventions in preterm neonates undergoing screening for retinopathy of prematurity: a systematic review
Source: HighWire-hosted journal article supplement (doi:10.1136/bmjophth-2023-001271), 2023-12-01
Supplement: bmjophth-2023-001271supp001_data_supplement.pdf [file bmjophth-2023-001271supp001_data_supplement.pdf]

**Appendix A: Excluded studies and reasons for exclusion**

| S/N | Study                                                                                                                                     | Reason for exclusion                       |
|-----|-------------------------------------------------------------------------------------------------------------------------------------------|--------------------------------------------|
| 1   | Gomaa, Nancy A; Elwaraky, Sara M<br>Annals of Neonatology Journal 2022;4(2):47-66                                                         | Non-RCT                                    |
| 2   | Leonard K, ANJ_ Volume 4_ Issue 2_ Pages 47-66                                                                                            | Non-RCT                                    |
| 3   | Slevin, M. British Journal of Ophthalmology 1997;81(9):762-764                                                                            | Non-RCT                                    |
| 4   | Zeraati H. et al. Anesthesiology and Pain Medicine / 2017;7(1):e42561.                                                                    | Non-RCT                                    |
| 5   | Velumula, PK. Et al. Journal of Perinatology 2022;42(7):914-919                                                                           | Wrong setting                              |
| 6   | Choudhary, P. et al. Journal of Advanced Medical and Dental Sciences Research 2018;6(4):91-94                                             | Wrong setting                              |
| 7   | Mitchell AJ. Retinopathy of Prematurity 01// 2003;(Ph.D.):196 p-196 p                                                                     | PhD dissertation. The publication included |
| 8   | Benzer D.et al. Journal of Perinatal Medicine / 2015;43(SUPPL. 1):                                                                        | Poster                                     |
| 9   | Ucar, S; Varma, M; Altan, S. 2014; 99(): A182-A183. 2014. DOI: 10.1136/archdischild-2014-307384.491                                       | Poster                                     |
| 10  | Zeraati H.et al.Journal of Mazandaran University of Medical Sciences / 2015;25(121):206-216                                               | Non-English article                        |
| 11  | Shadravan M et al. Kerman University of Medical Sciences And Health Systems.2000 395070030.pdf                                            | Non-English article                        |
| 12  | Zeraati H.et al. Journal of Babol University of Medical Sciences / 2015;17(5):19-24                                                       | Wrong outcome                              |
| 13  | Suksumek N.et al. Journal of the Medical Association of Thailand / 2017;100(5):521-527                                                    | Wrong outcome                              |
| 14  | Rush R et al. Retina Jan 2005;25(1):59-62                                                                                                 | Wrong outcome                              |
| 15  | O'Sullivan A. et al. Arch Dis Child Fetal Neonatal Ed Nov 2010;95(6):F419-22                                                              | Wrong outcome                              |
| 16  | Wagner H. 2019-MTH695-sbakouros-finalthesis.                                                                                              | Wrong outcome                              |
| 17  | Naik, A. et al. 2021; 10( 2): 73-78. DOI:10.4103/jcn.jcn_198_20                                                                           | Wrong intervention                         |
| 18  | Lemus-Varela, ML et al. Cardiol Vasc Res 2022;4(2):1-6                                                                                    | Wrong intervention                         |
| 19  | Chikkanayakanahalli, M et al. Infant 2009;5(5):155-8                                                                                      | Wrong intervention                         |
| 20  | Corrigan et al. Journal of Perinatology <a href="https://doi.org/10.1038/s41372-020-0719-9">https://doi.org/10.1038/s41372-020-0719-9</a> | Wrong timing of intervention               |
| 21  | Upadhyay A.; Gupta N.K. Indian Journal of Pediatrics / 2015;82(8):673-674                                                                 | Editorial commentary                       |
| 22  | Kleberg A. et al. Pediatrics May 2008;121(5):e1267-78                                                                                     | Inconsistency in methodology               |
| 23  | Ramoutar R. Research Square. doi: <a href="https://doi.org/10.21203/rs.3.rs-642733/v1">https://doi.org/10.21203/rs.3.rs-642733/v1</a>     | Non-peer review article                    |
